# Supplementary material for: Meloidogyne javanica fatty acid- and retinol-binding protein (Mj-FAR-1) regulates expression of lipid-, cell wall-, stress- and phenylpropanoid-related genes during nematode infection of tomato
Source: PubMed Central journal article supplement (PMC4450471; doi:10.1186/s12864-015-1426-3), 2015-04-08
Supplement: 12864_2015_1426_MOESM1_ESM.pdf [file 12864_2015_1426_MOESM1_ESM.pdf]

**Table A1.** The list of DEG belongs to biotic stress represented in MapMan illustration.

| <i>Functional categories</i> | <i>sub-category</i> | <i>Gene ID</i>     | <i>OE2-KAN2</i>    | <i>Annotation</i>                                                 |                                          |                                             |
|------------------------------|---------------------|--------------------|--------------------|-------------------------------------------------------------------|------------------------------------------|---------------------------------------------|
| Precursor synthesis          |                     | solyc06g069550.1.1 | -2.11955           | UDP-D-glucose dehydrogenase                                       |                                          |                                             |
|                              |                     | solyc05g054590.2.1 | -2.05549           | Bifunctional polymyxin resistance protein ArnA                    |                                          |                                             |
|                              |                     | solyc08g069110.2.1 | -7.29577           | Dtdp-glucose 4 6-dehydratase                                      |                                          |                                             |
|                              |                     | solyc05g046340.1.1 | -835.908           | Phosphomannomutase 3                                              |                                          |                                             |
| Cellulose synthesis          |                     | solyc09g009010.2.1 | -2.07662           | Cellulose synthase-like C1-2 glycosyltransferase family 2 protein |                                          |                                             |
|                              |                     | solyc02g072240.2.1 | -2.18779           | Cellulose synthase                                                |                                          |                                             |
|                              |                     | solyc07g005840.2.1 | -2.10016           | Cellulose synthase 3                                              |                                          |                                             |
|                              |                     | solyc09g072820.2.1 | -2.43029           | Cellulose synthase                                                |                                          |                                             |
|                              |                     | solyc03g070440.2.1 | -2.22474           | COBRA-like protein                                                |                                          |                                             |
|                              |                     | solyc03g114900.2.1 | -2.2787            | COBRA-like protein                                                |                                          |                                             |
|                              |                     | solyc09g075540.1.1 | -2.37443           | COBRA-like protein                                                |                                          |                                             |
|                              | Cell wall proteins  |                    | solyc09g007650.1.1 | -3.93894                                                          | Fasciclin-like arabinogalactan protein 7 |                                             |
|                              |                     | solyc06g075220.1.1 | -2.26688           | Fasciclin-like arabinogalactan protein 5                          |                                          |                                             |
|                              |                     | solyc09g007660.1.1 | -2.98588           | Fasciclin-like arabinogalactan protein 7                          |                                          |                                             |
|                              |                     | solyc11g069250.1.1 | -2.01137           | Fasciclin-like arabinogalactan protein                            |                                          |                                             |
|                              |                     | solyc07g053840.1.1 | -4.58789           | LRR receptor-like serine/threonine-protein kinase, RLP            |                                          |                                             |
| Cell wall                    | Degradation         | solyc03g083820.1.1 | -2.02833           | Endoglucanase 1                                                   |                                          |                                             |
|                              |                     | solyc08g081620.2.1 | -589.422           | Endoglucanase 1                                                   |                                          |                                             |
|                              |                     | solyc01g111340.2.1 | -2.26191           | Endo-1 4-beta-xylanase                                            |                                          |                                             |
|                              |                     | solyc01g079570.2.1 | -2.25082           | Beta xylosidase                                                   |                                          |                                             |
|                              |                     | solyc11g040330.1.1 | -2.16596           | Endo-1 4-beta-xylanase                                            |                                          |                                             |
|                              |                     | solyc05g005040.2.1 | -3.80312           | Polygalacturonase                                                 |                                          |                                             |
|                              |                     | solyc12g019120.1.1 | -5.15505           | Polygalacturonase                                                 |                                          |                                             |
|                              |                     | solyc12g096750.1.1 | -10.3227           | Polygalacturonase 4                                               |                                          |                                             |
|                              |                     | solyc04g025440.2.1 | -2.42823           | Polygalacturonase                                                 |                                          |                                             |
|                              |                     | solyc05g014000.2.1 | -2.36055           | Pectate lyase                                                     |                                          |                                             |
|                              |                     | solyc03g114240.2.1 | -2.02939           | BURP domain-containing protein (Fragment)                         |                                          |                                             |
|                              |                     | solyc12g019130.1.1 | -3.95129           | Polygalacturonase                                                 |                                          |                                             |
|                              |                     | solyc06g068040.2.1 | -15.2125           | Polygalacturonase                                                 |                                          |                                             |
|                              |                     | solyc12g019230.1.1 | -4.34642           | Polygalacturonase 1                                               |                                          |                                             |
|                              |                     | solyc08g060970.2.1 | -2.3641            | Polygalacturonase                                                 |                                          |                                             |
|                              |                     | solyc08g068150.2.1 | -2.26084           | BURP domain-containing protein                                    |                                          |                                             |
|                              |                     | solyc12g019140.1.1 | -3.53724           | Polygalacturonase                                                 |                                          |                                             |
|                              |                     | solyc02g062300.2.1 | -858.592           | BURP domain-containing protein                                    |                                          |                                             |
|                              |                     | Modification       |                    | solyc01g090810.2.1                                                | -2.09576                                 | Expansin protein                            |
|                              |                     |                    |                    | solyc08g077900.2.1                                                | -2.97689                                 | Expansin-like protein                       |
|                              |                     |                    |                    | solyc12g011030.1.1                                                | -2.54949                                 | Xyloglucan endotransglucosylase/hydrolase 7 |
|                              |                     |                    |                    | solyc10g005350.2.1                                                | -2.78442                                 | Xyloglucan endotransglucosylase/hydrolase 1 |
|                              |                     |                    |                    | solyc07g009380.2.1                                                | -2.24973                                 | Xyloglucan endotransglucosylase/hydrolase 2 |
|                              |                     |                    |                    | solyc10g086520.1.1                                                | -2.8156                                  | Expansin-1                                  |
|                              |                     |                    |                    | solyc03g093390.2.1                                                | -2.35591                                 | Expansin protein                            |
|                              |                     |                    |                    | solyc10g084780.1.1                                                | -3.97387                                 | Expansin                                    |
|                              | solyc07g006860.2.1  |                    | 3.374426           | Xyloglucan endotransglucosylase/hydrolase 3                       |                                          |                                             |
|                              | solyc03g098430.2.1  |                    | -2.55672           | Xyloglucan endotransglucosylase/hydrolase 5                       |                                          |                                             |
|                              | solyc07g006870.2.1  |                    | -2.41173           | Xyloglucan endotransglucosylase/hydrolase 8                       |                                          |                                             |
|                              | solyc04g081870.2.1  |                    | -2.07729           | Expansin                                                          |                                          |                                             |
|                              | solyc12g007260.1.1  |                    | -2.45414           | Xyloglucan endotransglucosylase/hydrolase 2                       |                                          |                                             |
|                              | solyc12g089380.1.1  |                    | -2.01632           | Expansin                                                          |                                          |                                             |
|                              | solyc09g010860.2.1  |                    | -2.04627           | Expansin                                                          |                                          |                                             |
| Pectin*esterases             |                     |                    | solyc12g008530.1.1 | -2.23358                                                          | Pectinesterase                           |                                             |

|                       |                |                    |                    |                                                               |                                                        |
|-----------------------|----------------|--------------------|--------------------|---------------------------------------------------------------|--------------------------------------------------------|
|                       |                | solyc04g080530.2.1 | -9.59834           | Pectinesterase family protein                                 |                                                        |
|                       |                | solyc03g083870.2.1 | -2.32474           | Pectinesterase                                                |                                                        |
|                       |                | solyc05g052540.1.1 | -2.06455           | Os03g0291800 protein (Fragment)                               |                                                        |
|                       |                | solyc01g079180.2.1 | -3.86348           | Pectinesterase                                                |                                                        |
| Hormone<br>metabolism | Auxins         | solyc06g059730.1.1 | -2.83725           | Auxin efflux carrier                                          |                                                        |
|                       |                | solyc10g009480.2.1 | -3.46104           | Dopamine beta-monoxygenase                                    |                                                        |
|                       |                | solyc12g005310.1.1 | -2.26529           | Auxin-responsive GH3-like                                     |                                                        |
|                       |                | solyc05g056430.1.1 | -3.48857           | Auxin responsive SAUR protein                                 |                                                        |
|                       |                | solyc12g017880.1.1 | -5.26585           | Dopamine beta-monoxygenase                                    |                                                        |
|                       |                | solyc03g082520.1.1 | 2.059969           | Auxin responsive SAUR protein                                 |                                                        |
|                       |                | solyc02g078500.2.1 | 2.251941           | Aluminum-induced protein-like (AHRD V1 ***-<br>Q9FG81_ARATH)" |                                                        |
|                       |                | solyc09g097890.2.1 | -2.42675           | Membrane protein                                              |                                                        |
|                       |                | solyc07g008290.2.1 | -2.56128           | Growth regulator like protein                                 |                                                        |
|                       |                | solyc07g048050.1.1 | -2.16153           | Dopamine beta-monoxygenase                                    |                                                        |
|                       |                |                    | solyc02g092820.2.1 | -3.48534                                                      | Indole-3-acetic acid-amido synthetase GH3.8            |
|                       |                | Brassinosteroid    | solyc11g006300.1.1 | -3.05859                                                      | 3-oxo-5-alpha-steroid 4-dehydrogenase family protein   |
|                       |                | Abscisic acid      | solyc08g066650.2.1 | -2.58612                                                      | Carotenoid cleavage dioxygenase 8                      |
|                       |                |                    | solyc11g071580.1.1 | -2.38489                                                      | Aldehyde oxidase                                       |
|                       |                |                    | solyc07g056570.1.1 | -2.31292                                                      | 9-cis-epoxycarotenoid dioxygenase                      |
|                       |                |                    | solyc05g007300.2.1 | -2.83089                                                      | Receptor expression-enhancing protein 5                |
|                       |                |                    | solyc11g072120.1.1 | -2.74013                                                      | 2-oxoglutarate-dependent dioxygenase                   |
|                       |                |                    | solyc11g010400.1.1 | -2.58598                                                      | 1-aminocyclopropane-1-carboxylate oxidase              |
|                       |                |                    | solyc09g089710.2.1 | -1072.17                                                      | 1-aminocyclopropane-1-carboxylate oxidase-like protein |
|                       |                |                    | solyc02g070080.2.1 | -2.66867                                                      | 1-aminocyclopropane-1-carboxylate oxidase 1            |
|                       |                |                    | solyc06g073580.2.1 | -2.83815                                                      | 1-aminocyclopropane-1-carboxylate oxidase 1            |
|                       |                |                    | solyc07g061720.2.1 | 2.248512                                                      | Gibberellin 2-oxidase                                  |
|                       |                |                    | solyc11g010410.1.1 | -2.01935                                                      | 1-aminocyclopropane-1-carboxylate oxidase              |
|                       |                |                    | solyc03g116290.1.1 | -2.2299                                                       | Gibberellin 2-beta-dioxygenase 2                       |
|                       |                |                    | solyc06g060070.2.1 | -2.007                                                        | 1-aminocyclopropane-1-carboxylate oxidase              |
|                       |                |                    | solyc11g072310.1.1 | 2.739978                                                      | Gibberellin 20-oxidase-3                               |
|                       |                |                    | solyc03g116280.2.1 | -2.55878                                                      | 1-aminocyclopropane-1-carboxylate oxidase              |
|                       |                | Ethylene           | solyc06g073080.2.1 | 5.337729                                                      | Flavonol synthase/flavanone 3-hydroxylase              |
|                       |                |                    | solyc11g072200.1.1 | -2.28355                                                      | 1-aminocyclopropane-1-carboxylate oxidase 3            |
|                       |                |                    | solyc02g080120.1.1 | -13.0393                                                      | Gibberellin 2-beta-dioxygenase 7                       |
|                       |                |                    | solyc09g010000.2.1 | 3.472034                                                      | 1-aminocyclopropane-1-carboxylate oxidase-like protein |
|                       |                |                    | solyc02g036350.2.1 | -2.03712                                                      | 1-aminocyclopropane-1-carboxylate oxidase              |
|                       |                |                    | solyc01g093980.2.1 | -693.752                                                      | Gibberellin 20-oxidase 4                               |
|                       |                |                    | solyc07g026900.1.1 | -2.71651                                                      | 1-aminocyclopropane-1-carboxylate synthase             |
|                       |                |                    | solyc12g008740.1.1 | -2.22579                                                      | 1-aminocyclopropane-1-carboxylate synthase             |
|                       |                |                    | solyc02g082060.1.1 | 2.450561                                                      | PPPDE peptidase domain-containing protein 1            |
|                       |                | solyc03g093610.1.1 | 2.07657            | Ethylene responsive transcription factor 1b                   |                                                        |
|                       |                | solyc10g079230.1.1 | -13.5826           | CM0545.450.nc protein                                         |                                                        |
|                       |                | solyc01g107490.1.1 | -16.2991           | BHLH transcription factor                                     |                                                        |
|                       |                | solyc04g080710.2.1 | -2.17321           | BHLH transcription factor-like protein                        |                                                        |
|                       | Salicylic acid | solyc09g091550.2.1 | 6.344305           | Salicylic acid carboxyl methyltransferase                     |                                                        |
|                       |                | solyc03g007390.2.1 | -2.40197           | Pentatricopeptide repeat-containing protein                   |                                                        |
|                       |                | solyc02g086230.1.1 | -3.86348           | Pentatricopeptide repeat-containing protein                   |                                                        |
|                       | Jasmonate      | solyc01g099180.2.1 | -360.055           | Lipoxygenase                                                  |                                                        |
|                       |                | solyc04g079730.1.1 | -4.43697           | cytochrome P450                                               |                                                        |
