# Supplementary material for: Meloidogyne javanica fatty acid- and retinol-binding protein (Mj-FAR-1) regulates expression of lipid-, cell wall-, stress- and phenylpropanoid-related genes during nematode infection of tomato
Source: PubMed Central journal article supplement (PMC4450471; doi:10.1186/s12864-015-1426-3), 2015-04-08
Supplement: 12864_2015_1426_MOESM2_ESM.pdf [file 12864_2015_1426_MOESM2_ESM.pdf]

**Table A2.** Detailed list of differentially expressed genes involved in the cell wall metabolism.

| <i>Pectin Esterase</i> |                    |                                 |
|------------------------|--------------------|---------------------------------|
| <i>Sample</i>          | <i>Number</i>      | <i>Functional description</i>   |
| <b>Clean</b>           | solyc05g047590.2.1 | Pectinesterase                  |
|                        | solyc02g081990.2.1 | Pectinesterase                  |
|                        | solyc09g075330.2.1 | Pectinesterase                  |
|                        | solyc02g075620.2.1 | Pectinesterase                  |
|                        | solyc04g080530.2.1 | Pectinesterase family protein   |
|                        | solyc09g075350.2.1 | Pectinesterase                  |
|                        | solyc01g090130.1.1 | Pectinesterase                  |
| <b>2 DAI</b>           | solyc12g008530.1.1 | Pectinesterase                  |
|                        | solyc04g080530.2.1 | Pectinesterase family protein   |
|                        | solyc03g083870.2.1 | Pectinesterase                  |
|                        | solyc05g052540.1.1 | Os03g0291800 protein (Fragment) |
|                        | solyc01g079180.2.1 | Pectinesterase                  |
| <b>5 DAI</b>           | solyc01g109740.2.1 | Pectinesterase family protein   |
|                        | solyc01g099950.1.1 | Pectinesterase                  |
|                        | solyc02g080200.2.1 | Pectinesterase                  |
|                        | solyc02g014300.1.1 | Pectinesterase                  |
|                        | solyc06g034360.1.1 | Pectinesterase                  |
|                        | solyc03g083840.2.1 | Pectinesterase                  |
|                        | solyc07g043240.2.1 | Pectinesterase                  |
|                        | solyc03g083870.2.1 | Pectinesterase                  |
|                        | solyc06g009190.2.1 | Pectinesterase                  |
| <b>15 DAI</b>          | solyc01g091050.2.1 | Pectinesterase                  |
|                        | solyc03g078100.2.1 | Pectinesterase family protein   |
|                        | solyc01g098940.2.1 | Pectinesterase                  |
|                        | solyc08g078640.1.1 | Pectinesterase                  |
|                        | solyc06g034360.1.1 | Pectinesterase                  |
|                        | solyc03g083840.2.1 | Pectinesterase                  |
|                        | solyc03g083360.2.1 | Pectinesterase                  |
|                        | solyc06g009190.2.1 | Pectinesterase                  |

| <i>Expansin</i>    |                    |                               |
|--------------------|--------------------|-------------------------------|
| <i>Sample</i>      | <i>Number</i>      | <i>Functional description</i> |
| <b>clean</b>       | solyc06g051800.2.1 | Expansin                      |
|                    | solyc03g115320.1.1 | Expansin                      |
|                    | solyc01g090810.2.1 | Expansin protein              |
|                    | solyc02g088100.2.1 | Expansin                      |
|                    | solyc10g086520.1.1 | Expansin-1                    |
|                    | solyc06g005560.2.1 | Expansin-1                    |
|                    | solyc04g081870.2.1 | Expansin                      |
|                    | solyc09g010860.2.1 | Expansin                      |
| <b>2d</b>          | solyc01g090810.2.1 | Expansin protein              |
|                    | solyc08g077900.2.1 | Expansin-like protein         |
|                    | solyc10g086520.1.1 | Expansin-1                    |
|                    | solyc03g093390.2.1 | Expansin protein              |
|                    | solyc10g084780.1.1 | Expansin                      |
|                    | solyc04g081870.2.1 | Expansin                      |
|                    | solyc12g089380.1.1 | Expansin                      |
|                    | solyc09g010860.2.1 | Expansin                      |
|                    | <b>5d</b>          | solyc03g115320.1.1            |
| solyc08g077900.2.1 |                    | Expansin-like protein         |
| solyc08g007780.2.1 |                    | Expansin-like protein         |
| solyc03g115310.1.1 |                    | Expansin                      |
| solyc10g008440.2.1 |                    | Expansin B1                   |
| solyc10g086520.1.1 |                    | Expansin-1                    |
| solyc03g093390.2.1 |                    | Expansin protein              |
| solyc08g080060.2.1 |                    | Expansin-like protein         |
| solyc09g010860.2.1 |                    | Expansin                      |
| <b>15d</b>         | solyc01g090810.2.1 | Expansin protein              |
|                    | solyc08g077900.2.1 | Expansin-like protein         |
|                    | solyc02g088100.2.1 | Expansin                      |
|                    | solyc10g086520.1.1 | Expansin-1                    |
|                    | solyc03g093390.2.1 | Expansin protein              |
| solyc04g081870.2.1 | Expansin           |                               |

| <i>Cellulose synthesis</i> |                    |                                                                   |
|----------------------------|--------------------|-------------------------------------------------------------------|
| <i>Sample</i>              | <i>Number</i>      | <i>Functional description</i>                                     |
| <b>clean</b>               | solyc03g114900.2.1 | COBRA-like protein                                                |
|                            | solyc09g009010.2.1 | Cellulose synthase-like C1-2 glycosyltransferase family 2 protein |
| <b>2d</b>                  | solyc02g072240.2.1 | Cellulose synthase                                                |
|                            | solyc07g005840.2.1 | Cellulose synthase 3                                              |
|                            | solyc09g072820.2.1 | Cellulose synthase                                                |
|                            | solyc03g070440.2.1 | COBRA-like protein                                                |
|                            | solyc03g114900.2.1 | COBRA-like protein                                                |
|                            | solyc09g075540.1.1 | COBRA-like protein                                                |
|                            | solyc08g005280.1.1 | Cellulose synthase-like protein                                   |
| <b>5d</b>                  | solyc02g072240.2.1 | Cellulose synthase                                                |
|                            | solyc09g072820.2.1 | Cellulose synthase                                                |
|                            | solyc03g114900.2.1 | COBRA-like protein                                                |
|                            | solyc01g103860.2.1 | Ch-cobra                                                          |
|                            | solyc02g080250.1.1 | COBRA-like protein                                                |
| <b>15d</b>                 | solyc09g009010.2.1 | Cellulose synthase-like C1-2 glycosyltransferase family 2 protein |
|                            | solyc07g043390.2.1 | Cellulose synthase family protein expressed                       |
|                            | solyc03g114900.2.1 | COBRA-like protein                                                |

| <i>Pectate lyase and polygalacturonases</i> |                                                                        |                                                                        |
|---------------------------------------------|------------------------------------------------------------------------|------------------------------------------------------------------------|
| <i>Sample</i>                               | <i>Number</i>                                                          | <i>Functional description</i>                                          |
| <b>clean</b>                                | solyc03g111690.2.1                                                     | Pectate lyase                                                          |
|                                             | solyc05g005040.2.1                                                     | Polygalacturonase                                                      |
|                                             | solyc12g096750.1.1                                                     | Polygalacturonase 4                                                    |
|                                             | solyc05g051350.1.1                                                     | Rhamnogalacturonate lyase                                              |
|                                             | solyc09g091430.2.1                                                     | Pectate lyase 1-27                                                     |
|                                             | solyc05g005170.2.1                                                     | Polygalacturonase 2                                                    |
|                                             | solyc06g068040.2.1                                                     | Polygalacturonase                                                      |
|                                             | solyc12g019230.1.1                                                     | Polygalacturonase 1                                                    |
| <b>2d</b>                                   | solyc05g005040.2.1                                                     | Polygalacturonase                                                      |
|                                             | solyc12g019120.1.1                                                     | Polygalacturonase                                                      |
|                                             | solyc12g096750.1.1                                                     | Polygalacturonase 4                                                    |
|                                             | solyc04g025440.2.1                                                     | Polygalacturonase                                                      |
|                                             | solyc05g014000.2.1                                                     | Pectate lyase                                                          |
|                                             | solyc03g114240.2.1                                                     | BURP domain-containing protein (Fragment)                              |
|                                             | solyc12g019130.1.1                                                     | Polygalacturonase                                                      |
|                                             | solyc06g068040.2.1                                                     | Polygalacturonase                                                      |
|                                             | solyc12g019230.1.1                                                     | Polygalacturonase 1                                                    |
|                                             | solyc08g060970.2.1                                                     | Polygalacturonase                                                      |
|                                             | solyc08g068150.2.1                                                     | BURP domain-containing protein                                         |
| <b>5d</b>                                   | solyc12g019140.1.1                                                     | Polygalacturonase                                                      |
|                                             | solyc02g062300.2.1                                                     | BURP domain-containing protein                                         |
|                                             | solyc12g019120.1.1                                                     | Polygalacturonase                                                      |
|                                             | solyc12g096750.1.1                                                     | Polygalacturonase 4                                                    |
|                                             | solyc02g080910.2.1                                                     | Pectate lyase family protein                                           |
|                                             | solyc12g019180.1.1                                                     | Polygalacturonase 7                                                    |
|                                             | solyc03g007940.2.1                                                     | Glycoside hydrolase family 28 protein/polygalacturonase family protein |
|                                             | solyc06g083580.2.1                                                     | Pectate lyase 1-27                                                     |
|                                             | solyc09g061890.2.1                                                     | Pectate lyase 1-27                                                     |
|                                             | solyc05g014000.2.1                                                     | Pectate lyase                                                          |
|                                             | solyc05g005540.2.1                                                     | BURP domain-containing protein (Fragment)                              |
|                                             | solyc08g014560.1.1                                                     | Polygalacturonase                                                      |
|                                             | solyc11g011310.1.1                                                     | Rhamnogalacturonate lyase                                              |
|                                             | solyc08g068150.2.1                                                     | BURP domain-containing protein                                         |
|                                             | <b>15d</b>                                                             | solyc11g011300.1.1                                                     |
| solyc12g096750.1.1                          |                                                                        | Polygalacturonase 4                                                    |
| solyc12g019180.1.1                          |                                                                        | Polygalacturonase 7                                                    |
| solyc01g100980.2.1                          |                                                                        | Polygalacturonase                                                      |
| solyc06g083580.2.1                          |                                                                        | Pectate lyase 1-27                                                     |
| solyc08g068130.1.1                          |                                                                        | BURP domain-containing protein (Fragment)                              |
| solyc12g019230.1.1                          |                                                                        | Polygalacturonase 1                                                    |
| solyc08g068150.2.1                          |                                                                        | BURP domain-containing protein                                         |
| solyc12g019140.1.1                          |                                                                        | Polygalacturonase                                                      |
| solyc01g109500.2.1                          | BURP domain-containing protein                                         |                                                                        |
| solyc01g094970.2.1                          | Glycoside hydrolase family 28 protein/polygalacturonase family protein |                                                                        |
