# Supplementary material for: Meloidogyne javanica fatty acid- and retinol-binding protein (Mj-FAR-1) regulates expression of lipid-, cell wall-, stress- and phenylpropanoid-related genes during nematode infection of tomato
Source: PubMed Central journal article supplement (PMC4450471; doi:10.1186/s12864-015-1426-3), 2015-04-08
Supplement: 12864_2015_1426_MOESM3_ESM.pdf [file 12864_2015_1426_MOESM3_ESM.pdf]

**Table A3.** Validation of RNA-Seq with qRT-PCR. Values given as log2 of the fold change.

| <i>ID</i>          | <i>Annotation</i>                           | <i>OE1-KAN1</i> |                | <i>OE2-KAN2</i> |                | <i>OE3-KAN3</i> |                | <i>OE4-KAN4</i> |                |                                |                          |
|--------------------|---------------------------------------------|-----------------|----------------|-----------------|----------------|-----------------|----------------|-----------------|----------------|--------------------------------|--------------------------|
|                    |                                             | <i>RNAseq</i>   | <i>qRT-PCR</i> | <i>RNAseq</i>   | <i>qRT-PCR</i> | <i>RNAseq</i>   | <i>qRT-PCR</i> | <i>RNAseq</i>   | <i>qRT-PCR</i> |                                |                          |
| Solyc05g053380.2.1 | WRKY transcription factor 31                | -2.30           | -0.42          | -1.99           | -1.65          | 1.60            | 0.34           | -2.02           | -2.24          | Genes shared by all treatments |                          |
| Solyc06g053510.2.1 | Spermidine synthase                         | -5.21           | -3.58          | -2.87           | -2.05          | -1.88           | -0.70          | 1.21            | 2.17           |                                |                          |
| Solyc08g008310.2.1 | Long-chain-fatty-acid-CoA ligase            | -3.21           | -3.08          | -2.93           | -2.63          | -3.52           | -2.72          | -3.27           | -3.23          |                                |                          |
| Solyc12g096750.1.1 | Polygalacturonase 4                         | -2.32           | -2.22          | -3.37           | -2.12          | -1.90           | -1.31          | -7.01           | -4.88          |                                |                          |
| Solyc09g007020.1.1 | Pathogenesis-related protein                | 1.70            | 1.49           | 1.24            | 0.80           | 1.07            | 1.21           | 1.14            | 1.03           |                                |                          |
| Solyc07g009510.1.1 | Chitinase                                   | 2.56            | 3.11           | 2.44            | 2.16           | 1.76            | 3.07           | 1.05            | 0.38           |                                |                          |
| Solyc02g092820.2.1 | Indole-3-acetic acid-amido synthetase GH3.8 | -2.99           | -2.21          | -1.80           | -1.59          | -4.29           | -3.38          | -5.59           | -5.43          |                                |                          |
| Solyc12g005310.1.1 | Auxin-responsive GH3-like                   | -2.75           | -2.27          | -1.18           | -1.23          | -3.60           | -2.94          | -4.05           | -4.11          |                                |                          |
| Solyc05g055540.1.1 | Nodulin family protein                      | 2.94            | 1.28           | 1.64            | 0.79           | 2.54            | 1.93           | 1.99            | 2.31           |                                |                          |
| Solyc10g086520.1.1 | Expansin-1                                  | -1.23           | -1.05          | -1.49           | -2.20          | -1.81           | -0.49          | -1.02           | -0.75          |                                |                          |
| Solyc05g018770.1.1 | Esterase/lipase/thioesterase                | -2.58           | -0.16          | -12.08          | -0.29          | -10.93          | 1.49           | -4.19           | 1.41           |                                |                          |
| Solyc05g053550.2.1 | Chalcone synthase                           |                 |                | 2.88            | 0.15           | 1.67            | 2.21           | -1.64           | -1.58          |                                | Infected treatments only |
| Solyc06g005210.1.1 | Cytochrome P450 like_TBP                    |                 |                | 2.12            | 1.53           | 1.10            | 0.80           | 1.17            | 0.65           |                                |                          |
| Solyc09g097770.2.1 | Cell wall protein                           |                 |                | 1.24            | 0.13           | 1.59            | 1.84           | 1.01            | 0.52           |                                |                          |
| Solyc08g021820.2.1 | Auxin responsive protein                    |                 |                | -10.04          | -1.08          | -2.65           | 2.10           | -4.16           | 1.13           |                                |                          |
| Solyc12g049140.1.1 | Extensin-like protein Ext1                  |                 |                | -2.16           | -1.02          | -3.51           | -2.12          | -2.25           | -0.38          |                                |                          |
| Solyc10g008700.1.1 | MYB transcription factor                    |                 |                | -1.65           | -1.42          | 2.34            | 3.05           | 1.86            | 1.99           |                                |                          |
| Solyc01g106640.2.1 | Pathogenesis-related protein 1              |                 |                | -1.43           | -1.35          | -2.26           | -1.73          | -3.63           | -1.67          |                                |                          |
| Solyc06g005310.2.1 | MYB transcription factor                    |                 |                | -1.30           | -1.29          | 1.64            | 2.38           | 1.19            | 0.86           |                                |                          |
| Solyc03g005320.2.1 | Fatty acid elongase 3-ketoacyl-CoA synthase |                 |                | -1.22           | -2.07          | 1.12            | -2.41          | 1.41            | -3.30          |                                |                          |
| Solyc07g006710.1.1 | Pathogenesis-related protein PR-1           |                 |                | -1.12           | -0.09          | -2.26           | -0.99          | -1.16           | -0.14          |                                |                          |
