# Supplementary material for: Meloidogyne javanica fatty acid- and retinol-binding protein (Mj-FAR-1) regulates expression of lipid-, cell wall-, stress- and phenylpropanoid-related genes during nematode infection of tomato
Source: PubMed Central journal article supplement (PMC4450471; doi:10.1186/s12864-015-1426-3), 2015-04-08
Supplement: 12864_2015_1426_MOESM4_ESM.pdf [file 12864_2015_1426_MOESM4_ESM.pdf]

**Table A4.** Forward and reverse primers sequences used for confirmation of values of differential expressed genes from transcriptomic data, through qRT-PCR, along with primers sets for internal control gene used to normalize gene expression throughout the qRT-PCR expression analysis.

| <i>Gene</i>                                 | <i>Number</i>      | <i>Forward 5'-3'</i>     | <i>Reverse 5'-3'</i>     | <i>Pathway involved</i>         | <i>Source</i>         |
|---------------------------------------------|--------------------|--------------------------|--------------------------|---------------------------------|-----------------------|
| Tubulin                                     | NM_001247878.1     | ACCATTGATCTCTGCAACCATG   | TTCACAGCCAATTTCTCTCAGG   | Reference gene                  | Iberkleid et al. 2013 |
| Actin                                       | U60482.1           | ATGTATGTTGCCATCCAGGCT    | TGTGGCTGACACGATCTCCA     | Reference gene                  | Iberkleid et al. 2013 |
| 18s                                         | BH01957 (NCBI)     | GAAACGGCTACCACATCCAAG    | CCCCGTGTTAGGATTGGGT      | Reference gene                  | Iberkleid et al. 2013 |
| WRKY transcription factor 31                | Solyc05g053380.2.1 | CCAAGGAGCTACTATCGTTGCA   | GGGCATGGATGTGTGTGAAC     | RNA regulation of transcription | This study            |
| Spermidine synthase                         | Solyc06g053510.2.1 | CCACTTGGTTCATTCCATCC     | GCGAGAGACCTCAAACAACGT    | Polyamine metabolism            | This study            |
| Long-chain-fatty-acid-CoA ligase            | Solyc08g008310.2.1 | TCTCTCATATCTCCCCTTGGCA   | AATCCTATTGAGGCGCCATG     | Lipid metabolism                | This study            |
| Polygalacturonase 4                         | Solyc12g096750.1.1 | CTATTGGCCCTGAAACTCG      | CCCAACCTAAGCTTCCAATGC    | Cell Wall                       | This study            |
| Pathogenesis-related protein                | Solyc09g007020.1.1 | TAGGTTGTGTCGGGCTCTT      | TTGTCCGACCCAATTGCC       | Biotic stress                   | This study            |
| Chitinase                                   | Solyc07g009510.1.1 | AAGCGTAAGTGCCCAACAAGC    | GCAGCCAGATCCACAGTAGTCAC  | Biotic stress                   | This study            |
| Indole-3-acetic acid-amido synthetase GH3.8 | Solyc02g092820.2.1 | CCCTCAGTTCAAATTCGTCAGG   | GTGTGTAATTCGGACTCATCGG   | Hormone metabolism              | This study            |
| Auxin-responsive GH3-like                   | Solyc12g005310.1.1 | CGGGAGGCCATTAGCTCGT      | GTTTGTGTAAGGGTCAGGACGTCT | Hormone metabolism              | This study            |
| Nodulin family protein                      | Solyc05g055540.1.1 | GGTAGAGTTGTGTCTGGCTTCTTG | TGTTATCGTGAGCATGAGAGGC   | Development                     | This study            |
| Expansin-1                                  | Solyc10g086520.1.1 | GCAACCCTGAAACCCTTC       | CTCCATTATCGTTAGGCAAGGC   | Cell Wall                       | This study            |
| Esterase/lipase/thioesterase                | Solyc05g018770.1.1 | CAGTCATCAATCTGTCTGGCTGTT | TTGATTGTTGCCTCGAAGTCC    | Not assigned                    | This study            |
| Chalcone synthase                           | Solyc05g053550.2.1 | CAACAAGGTTGCTTTGCTGG     | AACAACAAGAACTCGAGCACCC   | Secondary metabolism            | This study            |
| Cytochrome P450 like_TBP                    | Solyc06g005210.1.1 | CCCCTCCGATTTCATAGAA      | GTGTATAAGTGGGAGTCGAAAGGC | Not assigned                    | This study            |
| Cytochrome P450                             | Solyc07g052370.2.1 | TTGTATCCTCTCACACATGGC    | CCCATCATGGTTTCTGGCC      | Miscellaneous                   | This study            |
| Cell wall protein                           | Solyc09g097770.2.1 | GCTGAGACTACCAATGCGGTG    | CTTACGTTTGCCATAGCCCTTG   | Not assigned                    | This study            |
| Auxin responsive protein                    | Solyc08g021820.2.1 | CCCATCAATGCAATCACGAG     | GGCCTCTCAAAAACATCGCT     | RNA regulation of transcription | This study            |
| Extensin-like protein Ext1                  | Solyc12g049140.1.1 | GGGAATCCAAGTGAAGAAGCAA   | GCCATAGTGCATGTAGCAATCAAG | Not assigned                    | This study            |
| MYB transcription factor                    | Solyc10g008700.1.1 | AAGGACCTGAACTCTTGCTCCA   | TCCGAAACTTGGTGGTGCA      | RNA regulation of transcription | This study            |
| Pathogenesis-related protein 1              | Solyc01g106640.2.1 | ACTCTAATGGTCTTACGGCGA    | CCCACAAGTTAACAGCAGCAGT   | Biotic stress                   | This study            |
| MYB transcription factor                    | Solyc06g005310.2.1 | CATCCTGGTCTCAAACGTGGA    | TCTATTTCCCCATTTGGAGTGG   | RNA regulation of transcription | This study            |
| Fatty acid elongase 3-ketoacyl-CoA synthase | Solyc03g005320.2.1 | GCATATTTAGGATGGGAGGTGC   | GGATGAGTTGGTACTTGAACGTC  | Lipid metabolism                | This study            |
| Pathogenesis-related protein PR-1           | Solyc07g006710.1.1 | CCATCAATGCCCTCACTCAAC    | GAGCTGCATTTTGAGGAGCC     | Biotic stress                   | This study            |
