# Supplementary material for: Meloidogyne javanica fatty acid- and retinol-binding protein (Mj-FAR-1) regulates expression of lipid-, cell wall-, stress- and phenylpropanoid-related genes during nematode infection of tomato
Source: PubMed Central journal article supplement (PMC4450471; doi:10.1186/s12864-015-1426-3), 2015-04-08
Supplement: 12864_2015_1426_MOESM5_ESM.pdf [file 12864_2015_1426_MOESM5_ESM.pdf]

**Table A5.** Overview of primer pair used for promoter sequence amplification

| <i>Name of gene (promoter)</i> | <i>Solyc number</i> | <i>Forward (5' → 3')</i>    | <i>Reverse (5' → 3')</i>            | <i>Source</i> |
|--------------------------------|---------------------|-----------------------------|-------------------------------------|---------------|
| Lipoxygenase D                 | Solyc03g122340.2.1  | CCCATTCTCTGAGCTCTCTCGCCTTTC | CCAGTCAGCTCCCGGAATAATGTTCTCTCTTAAAT | This study    |
| Cell Wall Protein              | Solyc09g097770.2.1  | CGTGCTCTGCAGAGCTCATTCAAGAG  | CTGACCTACCCGGGTCTTAATTATTAT         | This study    |
